## Cuticular profiling of insecticide resistant *Aedes aegypti*

Ella Jacobs, Christine Chrissian, Stephanie Rankin-Turner, Maggie Wear, Emma Camacho, Jeff G. Scott, Nichole A. Broderick, Conor J. McMeniman, Ruth E. Stark, Arturo Casadevall

### **Abstract**

Insecticides have made great strides in reducing the global burden of vector-borne disease. Nonetheless, serious public health concerns remain because insecticide-resistant vector populations continue to spread globally. To circumvent insecticide resistance, it is essential to understand all contributing mechanisms. Contact-based insecticides are absorbed through the insect cuticle, which is comprised mainly of chitin polysaccharides, cuticular proteins, hydrocarbons, and phenolic biopolymers sclerotin and melanin. Cuticle interface alterations can slow or prevent insecticide penetration in a phenomenon referred to as cuticular resistance. Cuticular resistance characterization of the yellow fever mosquito, *Aedes aegypti*, is lacking. In the current study, we utilized solid-state Nuclear Magnetic Resonance (ssNMR) spectroscopy, gas chromatography/mass spectrometry (GC-MS), and transmission electron microscopy (TEM) to gain insights into the cuticle composition of congenic cytochrome P450 monooxygenase insecticide resistant and susceptible *Ae. aegypti*. No differences in cuticular hydrocarbon content or phenolic biopolymer deposition were found. In contrast, we observed cuticle thickness of insecticide resistant *Ae. aegypti* increased over time and exhibited higher polysaccharide abundance. Moreover, we found these local cuticular changes correlated with global metabolic differences in the whole mosquito, suggesting the existence of novel cuticular resistance mechanisms in this major disease vector.

### **Introduction**

Worldwide, vector control programs rely on insecticides to prevent vector-borne diseases. Mosquitoes are responsible for the most significant burden of vector-borne disease and consequently are a primary focus of public health interventions. *Aedes aegypti* is the primary vector of four arboviruses: yellow fever (YFV), dengue (DENV), chikungunya (CHIKV), and Zika (ZIKV) [1]. Of these arboviruses, dengue virus has the most significant public health burden with an estimated 50-100 million symptomatic infections per year [2, 3]. Moreover, *Ae. aegypti* has an encroaching geographic range that renders half of the world's population at risk for dengue infection [4]. Vector control in dengue endemic areas relies heavily on pyrethroid insecticides [5-8]. Over time, the selection pressure imposed by the extensive use of pyrethroids in these regions has resulted in increasingly widespread populations of highly insecticide resistant *Ae. aegypti* [7]. Consequently, insecticide resistance threatens to undermine *Ae. aegypti* control efforts in regions where vector-borne diseases are most prevalent.

Insecticide resistance is complex and often involves physiological resistance and behavioral responses [9-12]. Physiological resistance occurs via two primary mechanisms: target-site mutations and metabolic resistance. Contact-dependent pyrethroid insecticides target the *voltage-sensitive sodium channels* (*Vssc*), which are essential to the insect nervous system [13]. Insects with mutations in *Vssc* that prevent pyrethroid activity are phenotypically *knockdown resistant* (*kdr*) [14, 15]. Metabolically resistant insects exhibit increased expression and detoxifying activity of cytochrome P450 monooxygenases (CYPs) allowing for metabolization and excretion of insecticides [16, 17]. A large body of work has demonstrated that these physiological adaptations

45 play a significant role in insecticide resistance [11, 16]. In contrast, however, comparatively little  
46 is known about other physiological mechanisms that contribute to resistance, such as  
47 modifications to the insect exoskeleton [11, 16, 18]. The exoskeleton, also referred to as insect  
48 cuticle, is essential for structural integrity, barrier protection, sensation, hydration, and chemical  
49 communication [19, 20]. Furthermore, the cuticle is an arthropod's first line of defense against  
50 contact insecticides [18]. Modifications to the cuticle including thickening have been shown to  
51 slow, or even prevent the penetration of contact insecticides — a phenomenon first documented  
52 in the 1960s — yet the structural modifications and mechanisms contributing to cuticular  
53 thickening remain largely uncharacterized [11, 18, 21, 22]. Although cuticular resistance alone is  
54 insufficient to confer complete resistance, it acts synergistically with other resistance mechanisms  
55 to promote efficient insecticide elimination and limit internal damage [16, 18].

56 Mosquito cuticle is a formidable barrier to external assault; it is composed of three distinct  
57 layers, each with their own unique properties. The epicuticle is a thin, waxy, hydrocarbon-rich  
58 layer deposited on the outermost surface of the cuticle. Beneath the epicuticle lies the exocuticle,  
59 followed by the endocuticle. Both the exo- and endocuticular layers consist of macromolecular  
60 frameworks composed of the polysaccharide chitin, with proteins and lipids interwoven  
61 throughout [20, 23]. The exocuticle has a distinct lamellar structure that forms soon after adults  
62 eclose from pupae, whereas the soft endocuticle is deposited after eclosion [23, 24]. The lamellar  
63 structure of the exocuticle is hard and rigid due to the deposition of tyrosine-derived sclerotin, a  
64 process known as sclerotization. During sclerotization, chitin is cross-linked to key residues of  
65 cuticular proteins via the oxidative conjugation of tyrosine-derived catechols, resulting in cuticular  
66 hardening conferring structural stability and resiliency. The pigmented biopolymer melanin,  
67 another tyrosine-derived component of the exocuticle, is responsible for cuticular darkening [25-  
68 29]. Like sclerotin, melanin is a highly recalcitrant phenolic-based polymer that is crosslinked to  
69 other cuticular moieties, albeit to a lesser degree [23, 30, 31]. Melanin has several outsized roles  
70 in other physiological processes such as wound healing and the insect immune response [28].  
71 Phenoloxidases, including laccases and tyrosinases, produce phenolic biopolymers for these  
72 various processes under tight regulation to limit internal damage [32, 33]. Due to their  
73 compatibility with a range of substrates, phenoloxidases have a proposed role in detoxification in  
74 many invertebrates [34-36]. While sclerotin and melanin are present in insect cuticle in relatively  
75 small quantities, they are biologically important and their presence in the cuticle suggests that  
76 these two phenolic biopolymers may contribute to cuticular insecticide resistance.

77 Recent work has demonstrated that cuticles of insecticide resistant populations in malaria  
78 vectors *Anopheles gambiae* and *An. funestus* possess distinct structural and biochemical  
79 alterations [18]. In contrast, very few studies have directly characterized cuticular alterations in  
80 the major arboviral vectors of the genus *Aedes* [37, 38]. One notable feature of this resistant  
81 phenotype is leg cuticular thickening. Mosquitoes are often exposed to insecticides while resting  
82 on treated surfaces, rendering the leg cuticle an important interface for contact-dependent  
83 insecticide absorption [12, 39, 40]. In comparisons of mosquito leg cross-sections using electron  
84 microscopy (EM), insecticide resistant *An. gambiae* and *An. funestus* were found to have thicker  
85 cuticles [40-44]. While EM is well-suited to characterize the exo- and endocuticular layers, the  
86 thin, waxy hydrocarbon-rich epicuticle is not commonly visible [40]. However, the long-chain  
87 (~C21–C37+) alkane or alkene cuticular constituents are readily extractable from the epicuticle  
88 and can be profiled using gas chromatography/mass spectrometry (GC-MS) [45]. These aliphatic

89 lipids have been shown to serve as a barrier to desiccation, and their increased cuticular  
90 abundance has been correlated with insecticide resistance [19, 44, 46, 47].

91 No investigations of the potential contribution of sclerotin and melanin to cuticular  
92 resistance have appeared in the literature. More broadly, the phenomenon of cuticular resistance  
93 is understudied in *Ae. aegypti*. To address these shortcomings, we profiled cuticular differences  
94 between two characterized congenic strains: susceptible Rockefeller (ROCK) and CYP-mediated  
95 metabolically resistant strain herein referred to as CR [17]. This strain was derived from the well-  
96 characterized pyrethroid resistant Singapore (SP) strain that possesses resistance loci conferring  
97 both KDR and CYP resistance [16]. It is well-established that KDR and CYP interact with one another  
98 in nonadditive ways [48, 49]. To study the resistance mechanisms individually, the SP resistance  
99 loci were crossed into the ROCK genetic background and then isolated into two separate strains  
100 containing either the CYP-mediated resistance locus (CR) or KDR resistance locus [50]. The CR  
101 strain used in this work is primarily resistant to pyrethroid insecticides, with some cross-resistance  
102 to several organophosphate insecticides due to overexpression of several identified CYP genes [17,  
103 50]. The possibility that the CR strain possessed cuticular morphology and compositional changes  
104 associated with the isolation of CYP-mediated resistance was unknown.

105 In this work we have utilized complementary biophysical, biochemical, and imaging  
106 methodologies to characterize the cuticle of the congenic ROCK and CR strains. Our studies  
107 focused primarily on female mosquitoes of this strain in light of the male's inability to transmit  
108 vector-borne diseases. We adapted a methodology used to enrich for deposited fungal melanin to  
109 compare insecticide resistant and susceptible *Ae. aegypti* females [51]. Because insects produce  
110 sclerotin in addition to melanin, we utilized *Drosophila melanogaster* pigmentation mutants to  
111 validate the ability of this method to consistently recover phenolic compounds as well as their  
112 associated lipid and polysaccharides. Due to the structurally complex, insoluble nature of insect  
113 cuticle, we utilized solid-state Nuclear Magnetic Resonance (ssNMR) spectroscopy to compare the  
114 sclerotin and melanin-rich acid-resistant material as well as whole intact mosquitoes from  
115 insecticide resistant and susceptible *Ae. aegypti* females. Because the relationship between  
116 insecticide resistance mechanisms and phenoloxidase activity has not been fully elucidated [49,  
117 52], we compared phenoloxidase activity in the two strains. Additionally, we monitored cuticular  
118 thickening and changes in cuticle ultrastructure over time using TEM at 3-5 d and 7-10 d post-  
119 eclosion. Finally, we analyzed the cuticular hydrocarbon content from both males and females  
120 using gas chromatography/mass spectrometry (GC-MS). Our analyses finds that neither cuticular  
121 hydrocarbons nor phenolic biopolymer deposition differed between insecticide resistant and  
122 susceptible mosquito strains. However, increased endocuticle deposition was observed in  
123 resistant mosquitoes, suggesting the existence of novel mechanisms of cuticular resistance in this  
124 globally important disease vector.

125  
126  
127  
128  
129  
130  
131  
132

133 **Results**

134 **Differences in phenoloxidase activity between CR and ROCK females**

135 Phenoloxidases produce melanin pigments, which are important parts of the insect immune  
136 response. Constitutively active phenoloxidase activity, a measurement of baseline immune  
137 activation [53], was estimated by incubating individual female mosquito homogenates with 2 mM  
138 of the melanin precursor L-DOPA. There was no difference in constitutively active phenoloxidase  
139 between the two strains, indicating a similar level of baseline immune activation (Fig. 1A).

140 However, because active phenoloxidases produce damaging reactive oxygen species, most  
141 phenoloxidases are present as zymogenic pro-phenoloxidases that require protease cleavage for  
142 activation [53, 54]. To estimate total phenoloxidase content, including zymogenic pro-  
143 phenoloxidases that require proteolytic cleavage, homogenates were incubated with the  
144 proteolytic enzyme  $\alpha$ -chymotrypsin. A clearly diminished level of total phenoloxidase activity was  
145 evident in the insecticide resistant CR strain (Fig 1B).

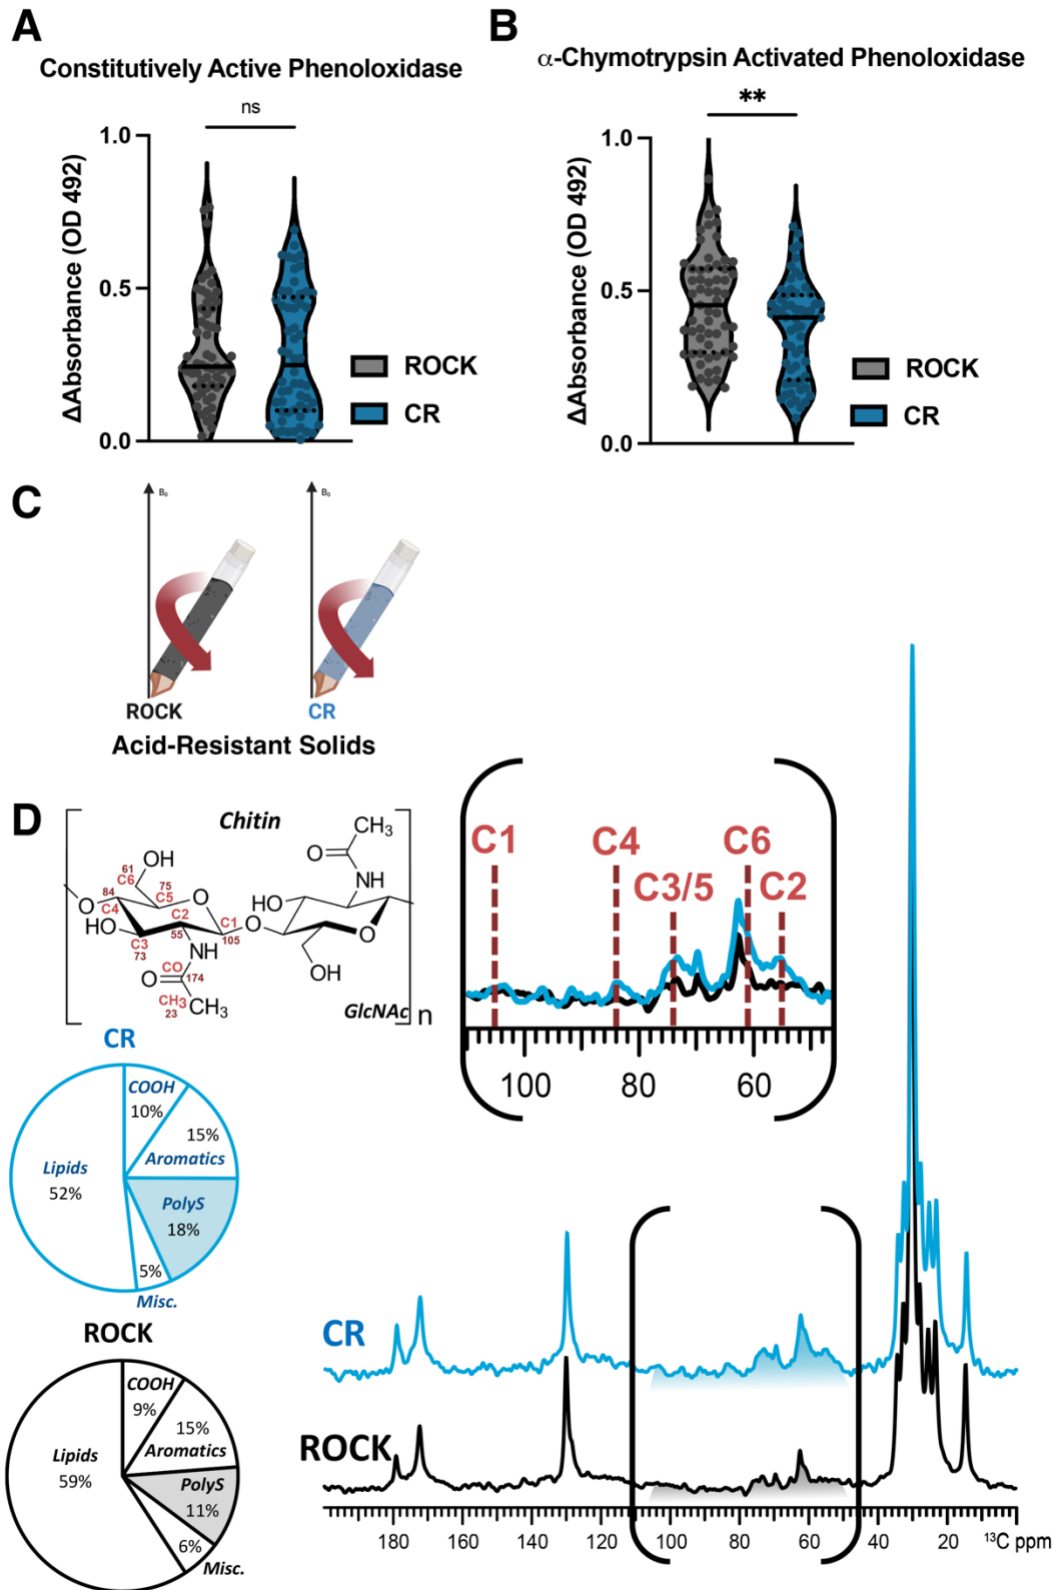

146

147

148

Figure 1: Characterization of phenoloxidase activity and cuticular content of insecticide resistant and susceptible *Ae. aegypti*

149 **A:** Constitutive phenoloxidase activity of insecticide-susceptible ROCK (grey) and insecticide-  
150 resistant CR (dark blue) female mosquito homogenate after incubation with 2 mM L-DOPA. Data  
151 points represent the change in absorbance (OD 492) after 45 minutes at 30°C from individual  
152 mosquitoes from three biological replicates. Sample size: ROCK n = 59 CR n = 58. Constitutively  
153 active phenoloxidase Mann-Whitney test p value = 0.3927 **B:** Constitutive phenoloxidase activity  
154 of insecticide-susceptible ROCK (grey) and insecticide-resistant CR (dark blue) female mosquito  
155 homogenate after incubation with 2 mM L-DOPA and 0.07 mg/mL  $\alpha$ -chymotrypsin. Data points  
156 represent the change in absorbance (OD 492) after 45 minutes at 30°C from individual mosquitoes  
157 from three biological replicates. Sample size: ROCK n = 59 CR n = 58.  $\alpha$ -chymotrypsin activated  
158 phenoloxidase unpaired students t-test p value = 0.0076. **C:** Schematic of solids loaded into ssNMR  
159 rotor to compare acid-resistant material from both strains **D:**  $^{13}\text{C}$  DPMAS ssNMR (50-sec delay;  
160 quantitatively reliable) comparison of acid-resistant material of the CR (dark blue) and ROCK (grey)  
161 strains pooled from three biological replicates.

162

### 163 **Validation of acid-resistant material from *D. melanogaster***

164 In addition to immunity, insect melanin, along with sclerotin, plays a vital role in maintaining the  
165 structural integrity of the cuticle [27]. Both melanin and sclerotin are found in the exocuticle,  
166 where they form strong covalent crosslinks to other cuticular moieties, such as chitin and proteins.  
167 We wanted to know whether these structurally amorphous phenolic biopolymers and their  
168 crosslinked constituents contribute to cuticular resistance. Prolonged HCl hydrolysis has been  
169 carried out previously on insects to isolate the acid-resistant portion of the cuticle, a method also  
170 implemented for the crude isolation of melanin deposited in fungal cells and mammalian hair [51,  
171 55, 56]. Melanin and sclerotin share many biophysical properties, including acid degradation  
172 resistance, and therefore are virtually indistinguishable using these treatments [56, 57]. As such,  
173 it remained unclear whether the acid-resistant material yielded by the prolonged HCl digestion of  
174 insects was enriched in melanin, sclerotin, or a mixture of the two biopolymers. To verify that both  
175 melanin and sclerotin protect bonded constituents from acid hydrolysis, *D. melanogaster* flies  
176 from the pigmentation mutant strains ‘Ebony’ and ‘Yellow,’ which are unable to produce sclerotin  
177 and eumelanin, respectively, were subjected to prolonged digestion in concentrated HCl. The mass  
178 of the solid material recovered from each *D. melanogaster* strain, expressed as a percentage of  
179 the starting sample mass, is shown in Supplementary Fig. 1A. The eumelanin-deficient yellow  
180 strain and sclerotin-deficient ebony strain yielded acid-resistant material, but each of the two  
181 pigmentation mutant strains yielded less acid resistant material in comparison to the wild-type *D.*  
182 *melanogaster* strain (Yellow: 6.48%; Ebony: 7.80%; WT: 9.04%). These findings indicate that both  
183 sclerotin and melanin contribute to the acid resistance of insect cuticle. To confirm that prolonged  
184 HCl digestion was a suitable means to prepare insect cuticle samples that are enriched in both  
185 polymers, the acid-resistant material from each *D. melanogaster* strain was analyzed using  
186 Carbon-13 ( $^{13}\text{C}$ ) ssNMR spectra (Supplementary Fig. 1B). As anticipated, all three spectra were  
187 largely similar; they each displayed a broad resonance that spanned the aromatic carbon region  
188 (~110-160 ppm) that is characteristic of amorphous phenolic polymers [58, 59] and contributed  
189 similarly to the overall signal intensity of each spectrum (Ebony and WT: 22.2%; Yellow: 22.1%).

## A Percentage of Mass Resistant to Acid Digestion

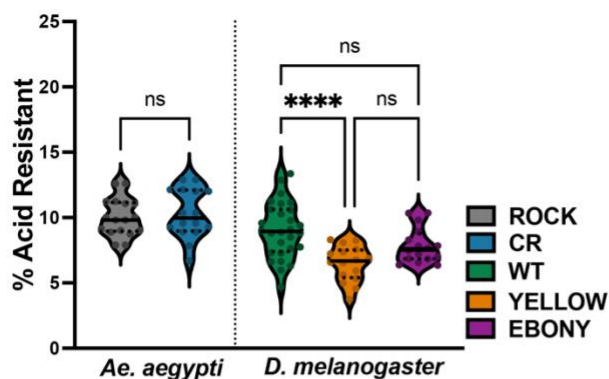

## B

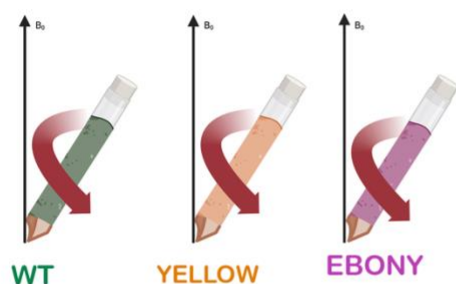

$^{13}\text{C}$  DPMAS (50-sec recycle delay)  
Quantitatively reliable

## C

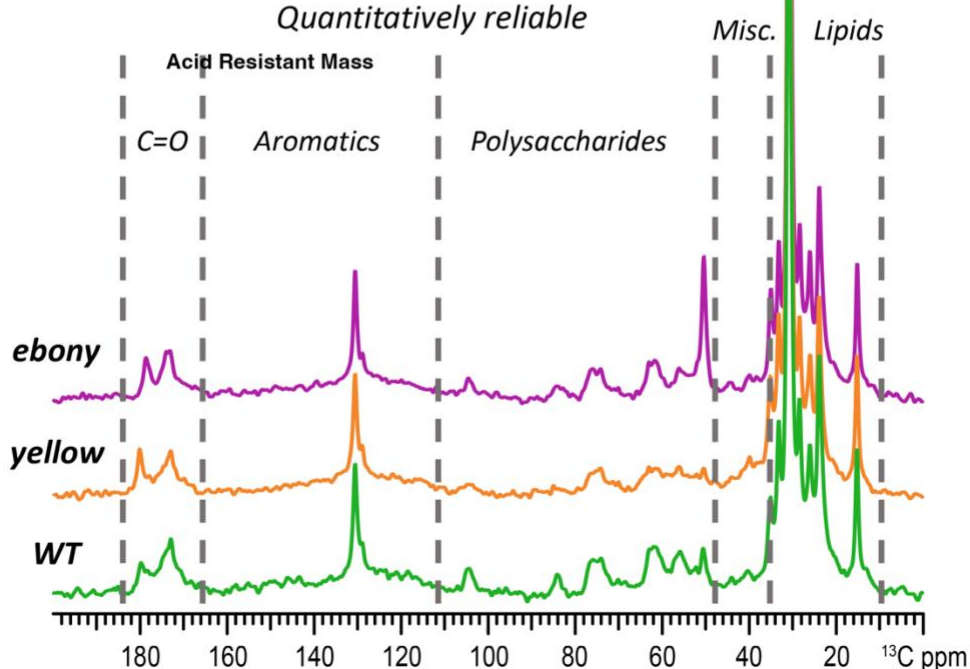

190

## 191 Supplementary Figure 1

192 A: Percentage of female *Ae. aegypti* ROCK (grey) and CR (dark blue) and *D. melanogaster* WT  
193 (green), yellow (orange), and ebony (pink) wet weights that were resistant to acid digestion. All  
194 digestion samples contained 25 females each across three pooled biological replicates. Sample  
195 number: CR n = 16, ROCK n = 17, WT n = 28, yellow n = 16, Ebony n = 16. One-way ANOVA with

196 Tukey's Multiple Comparison test p value: \*\*\*\* = <0.0001, \*\* = 0.0048 **B:** Schematic of material  
197 loaded into ssNMR rotor to compare acid-resistant material from *D. melanogaster* strains **C:**  
198 direct-polarization (DPMAS) Carbon-13 (<sup>13</sup>C) ssNMR (50-sec delay; quantitatively reliable)  
199 comparison of acid-resistant material of the WT (green), yellow (orange), and ebony (pink) strains  
200 pooled from three biological replicates.

201

## 202 **ssNMR analysis of acid-resistant material from CR and ROCK females**

203 To our knowledge, no prior reports have analyzed phenolic biopolymers contribution to cuticular  
204 resistance. Although the masses of acid-resistant material were the same between the susceptible  
205 and resistant *Ae. aegypti* strains (Supp. Fig. 1A), we were curious to determine the chemical  
206 composition of these materials was unknown. To address this gap in knowledge, <sup>13</sup>C ssNMR was  
207 performed to characterize the molecular architecture of the acid-resistant material recovered  
208 after HCl digestion of CR or ROCK mosquitoes (Fig. 1C). To probe for compositional differences  
209 between the two strains, direct-polarization (DPMAS) measurements with a long recycle delay (50  
210 sec between successive data acquisitions) were carried, yielding data with quantitatively reliable  
211 peak intensities (Fig. 1D). Thus, the area of each spectral region compared to the total integrated  
212 area across the spectrum represents the relative amount of the corresponding acid-resistant  
213 cuticular moiety in the sample. The <sup>13</sup>C ssNMR spectra of the acid-resistant samples from CR (blue  
214 trace) and ROCK (black trace) mosquitoes are shown in Figure 1D, each normalized to the tallest  
215 peak of the spectrum (~30 ppm). The two spectra are generally similar in appearance: both display  
216 signals in the regions attributable to long aliphatic chains of hydrocarbons (~10-40 and 130 ppm),  
217 polysaccharides (50-110 ppm) and pigments (110-160 ppm). The integrated area of the spectral  
218 region where the aromatic pigment carbons resonate contributes similarly to the total integrated  
219 signal intensity of each spectrum (15% for each), indicating that the relative amounts of phenolic  
220 biopolymers are similar in both samples.

221

222 However, by setting the tallest peak to full scale, a difference in the relative polysaccharide content  
223 between the two samples became apparent visually. This finding was corroborated by quantitative  
224 analysis: a relative increase in the polysaccharide content was observed in CR compared to ROCK  
225 (18% vs. 11%, respectively) with a concurrent decrease in lipid content (52% vs. 59%). Due to the  
226 acid digestion process and lack of phenolic biopolymers in the epicuticle, the lipids retained in this  
227 material are unlikely to be epicuticular hydrocarbons that can be extracted for GC-MS analysis.  
228 The polysaccharide content of these samples is likely to consist primarily of chitin, which is  
229 crosslinked to other cuticular moieties, because polysaccharides that are not covalently bonded  
230 within the cuticle are unlikely to withstand 24-hour digestion in concentrated HCl [60, 61]. This  
231 supposition is supported by chemical shift analysis of the ssNMR data. Whereas the <sup>13</sup>C chemical  
232 shifts of the ring carbons of most polysaccharide species lie between 60 and 110 ppm, the C2 ring  
233 carbon of chitin, which is amide bonded to the acetyl-group nitrogen, gives rise to a characteristic  
234 ~55 ppm signal that is clearly observed with greater intensity in the CR sample spectrum (Fig. 1D  
235 inset).

236

## 237 **Size and polysaccharide differences in insecticide resistant CR females**

238 Previous work has demonstrated that CYP-mediated resistance in *Ae. aegypti* occurs with a trade-  
239 off in body size [49]. In agreement with previous findings, the CR female mosquitoes had



240 significantly smaller body mass compared to ROCK females (Fig. 2A). However, it has not previously  
241 been assessed whether this difference in body mass is correlated with differences in the overall  
242 molecular composition of the whole insect, which could contribute to cuticular changes. Profiling  
243 of whole mosquitoes provides the opportunity to measure the polysaccharide content of the  
244 whole organism in addition to the lipids retained within insect fat bodies, which are also distinct  
245 from epicuticular hydrocarbons that can be extracted for GC-MS analysis [62].

246  
247 To explore this possibility, quantitatively reliable DPMAS <sup>13</sup>C NMR experiments were performed  
248 on 20 whole CR or ROCK female mosquitoes (Fig. 2B). The spectra of CR (blue trace) and ROCK  
249 (black trace) whole mosquitoes are shown in Figure 2C, each normalized to the tallest peak (~30  
250 ppm). In contrast with the acid-resistant ssNMR data, the CR and ROCK whole-mosquito spectra  
251 contain more subtle differences in several spectral regions. Although it is visually apparent that  
252 the total NMR signal intensity displayed within the polysaccharide spectral region (~55-110 ppm)  
253 is greater in the CR mosquito spectrum in comparison to the ROCK spectrum, quantitative analysis  
254 revealed that there is only a marginal difference between the two strains in terms of  
255 polysaccharide composition (26% vs 24% for CR and ROCK, respectively).

256  
257 However, there are three notable differences between the CR and ROCK whole-mosquito spectra;  
258 namely, two sharp signals at ~180, and 130 ppm that appear with greater intensity in the ROCK  
259 spectrum, and a sharp signal at 50 ppm that is displayed only in the CR spectrum. Specifically, the  
260 more prominent 180 ppm peak visible in the ROCK spectrum is where the carboxyl carbon of free  
261 fatty acids resonate, and a slightly more prominent peak at 130 ppm, which is typical for aromatic  
262 and ethylene carbons of unsaturated lipids [62]. In contrast, the identification of the peak at 50  
263 ppm is more ambiguous: the chemical shift is consistent with a secondary or tertiary carbon that  
264 is covalently bonded to one or more electronegative atoms, such as oxygen or nitrogen. The  
265 intense signal at 50 ppm that appears only in the CYP spectrum could be present as a direct  
266 outcome of CYP gene overexpression. Since this CR strain is known to hydroxylate pyrethroid  
267 insecticides, in the absence of these compounds CYP enzymes might non-specifically hydroxylate  
268 structurally similar compounds; the aliphatic carbons of secondary metabolites that have been  
269 hydroxylated would resonate at 50 ppm.

270  
271

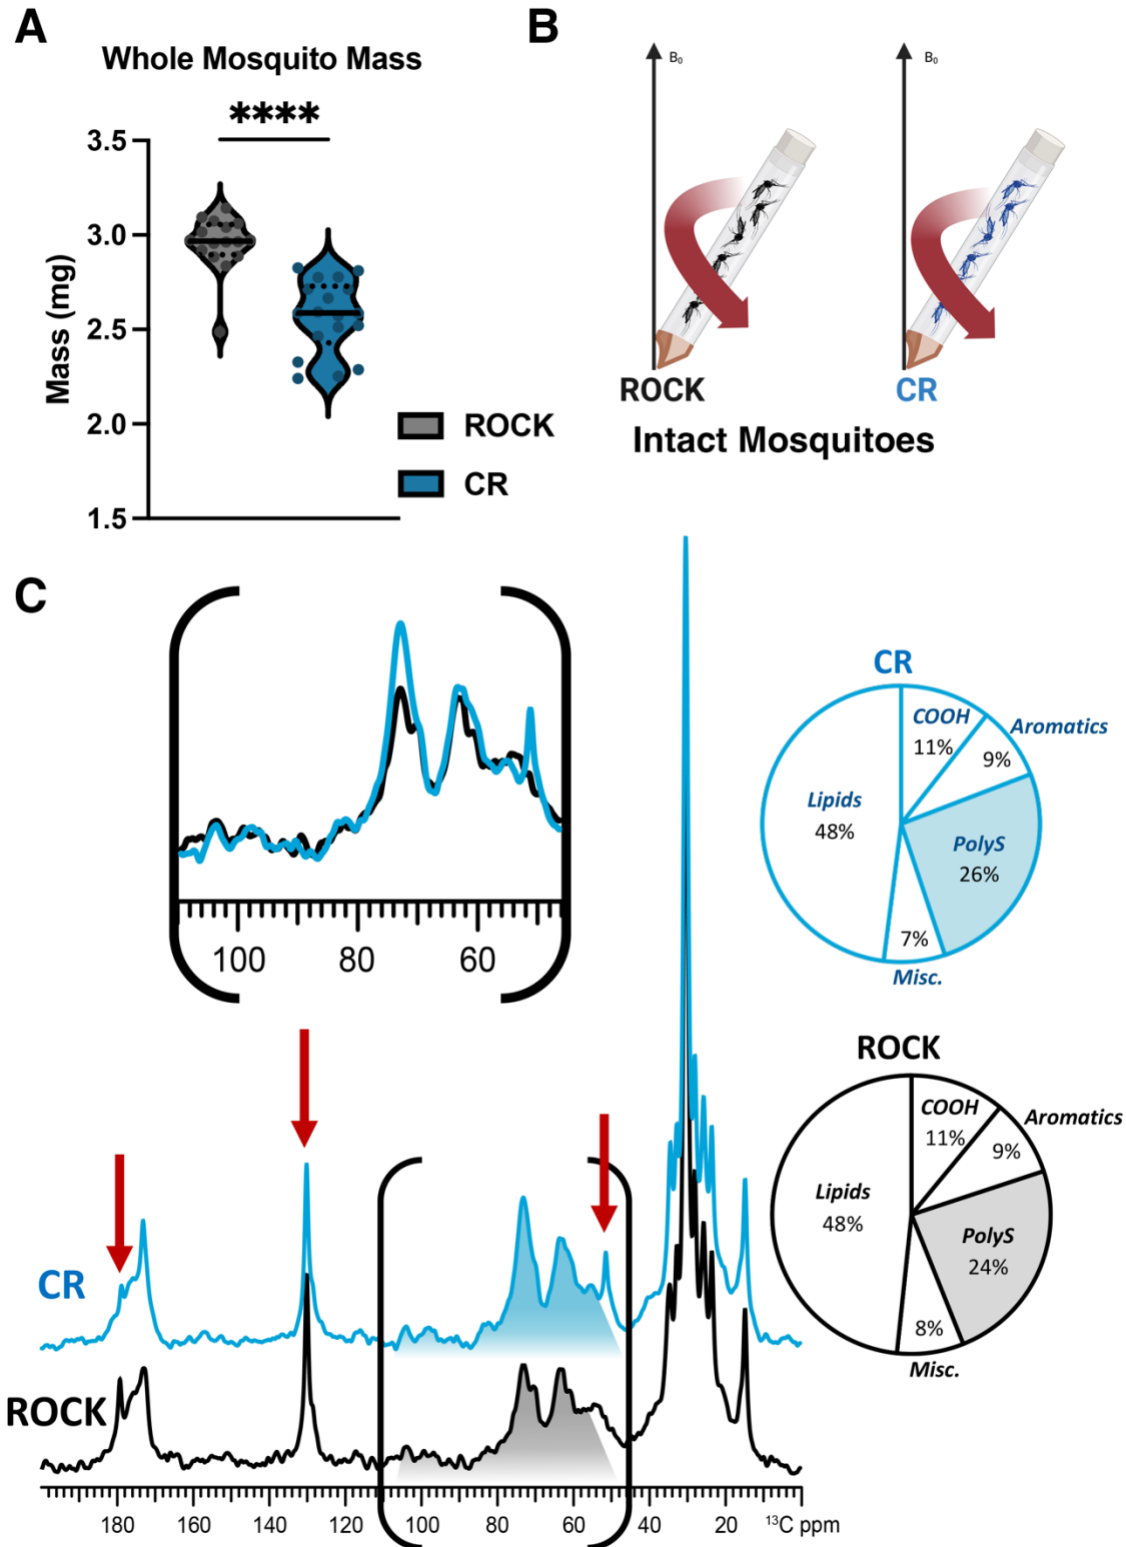

272

273

274

275

276

Figure 2: Solid-state NMR characterization of whole insecticide resistant and susceptible *Ae. aegypti*

A: Single mosquito mass estimated from pooled groups of 25 females across four biological replicates. Sample size: CR n = 16; ROCK n = 18. Mann-Whitney test p value = <0.0001 B: Schematic

277 of material loaded into ssNMR rotor to compare female mosquitoes of both strains C:  $^{13}\text{C}$  DPMAS  
278 ssNMR (50-sec delay; quantitatively reliable) comparison for 20 whole female mosquitoes of each  
279 strain.

280

281

## 282 Changes in cuticular thickness over time

283 Cuticle thickening is an established cuticular resistance phenotype [18]. However, past work has  
284 not explored if cuticle thickness increases over time. Cross-sections of female CR and ROCK femurs  
285 were used to compare cuticle thickness and thickening over time at 3-5 d and 7-10 d post-eclosion  
286 from the same rearing cohort (Fig 3A, Sup. Fig. 2). Cross-sections were imaged using TEM. Total  
287 cuticle, endocuticle, and exocuticle measurements were obtained from 10 femurs per group (40  
288 total femurs) and 10 images per femur were measured. CR resistant females had significantly  
289 larger total cuticle width than ROCK at both time points (Fig 3B, left). Notably, CR endocuticle  
290 width increased over time, whereas the ROCK endocuticle width did not increase. Moreover,  
291 cuticular thickening occurred primarily at the endocuticle (Fig 3B, middle). Analysis of TEM images  
292 showed that the exocuticle remained unchanged in both ROCK and CR when each strain was  
293 compared at 3-5 d and 7-10 d, thus serving as an internal control for consistent location of leg  
294 sectioning between samples (Fig 3B, right). Although exocuticle measurements of CR at 7-10 d  
295 (mean = 1.81 SD = 0.32) are statistically significantly larger than ROCK at 7-10 d (mean = 1.724 SD  
296 = 0.29), the 0.084  $\mu\text{m}$  difference between mean exocuticle thicknesses is unlikely to be biologically  
297 significant.

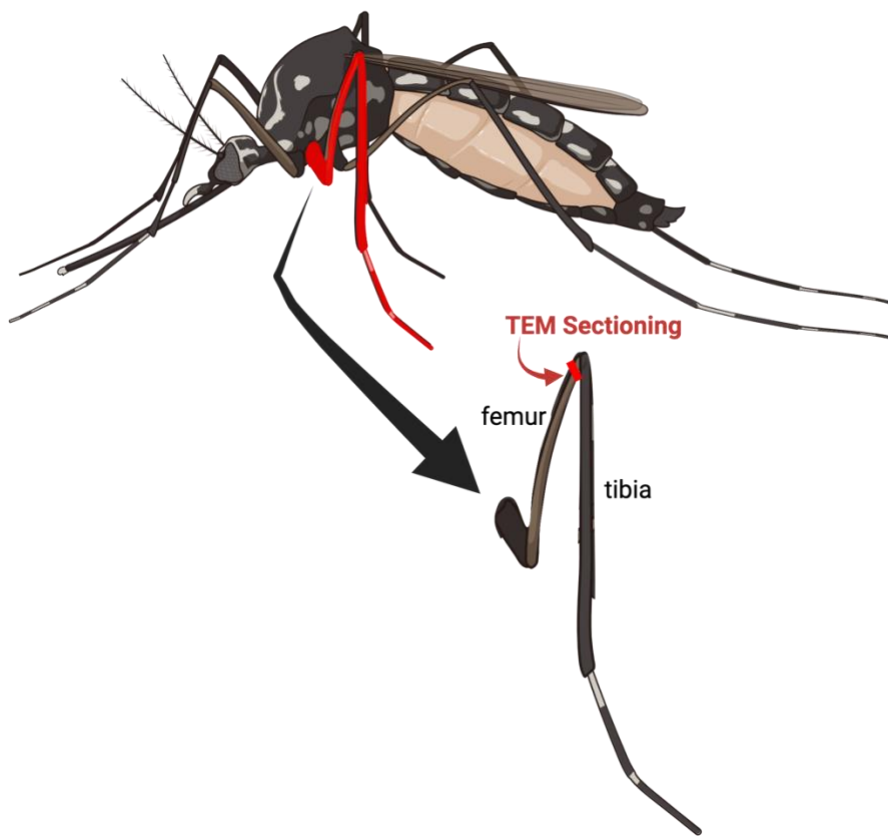

298

299 **Supplementary Figure 2**

300 A: Schematic of TEM sectioning performed 200 nm into the midleg femur.

**A**

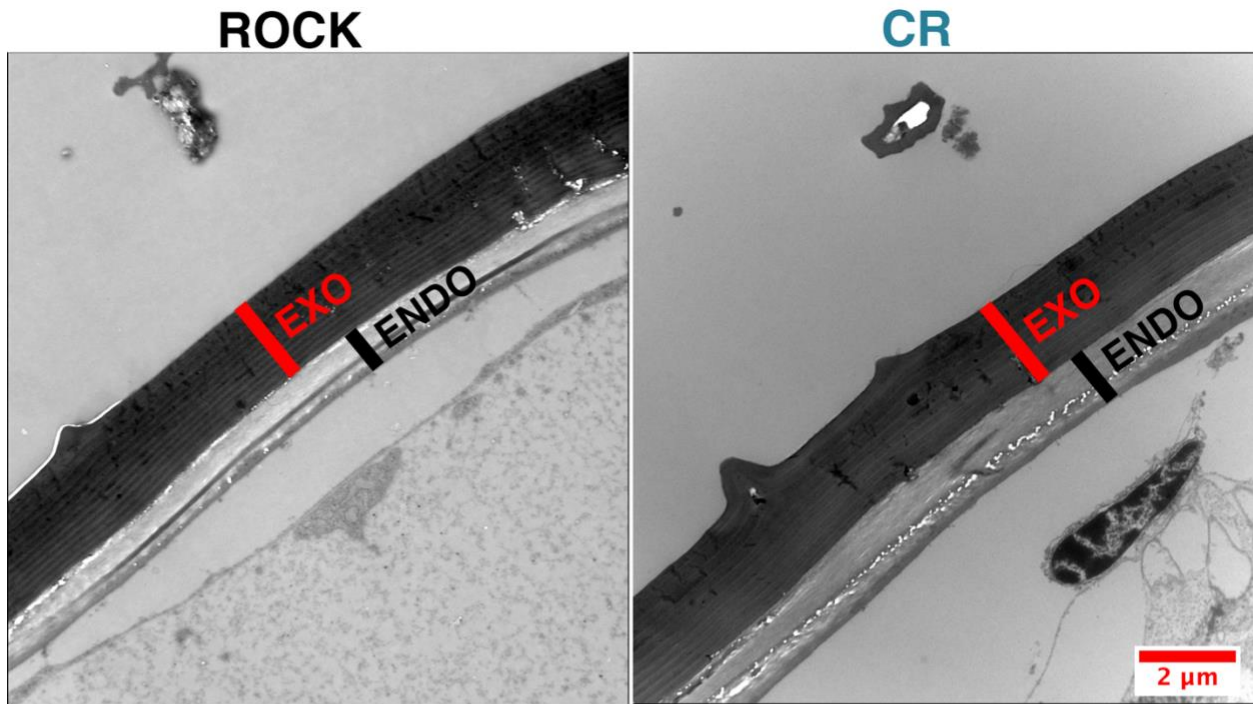

**B**

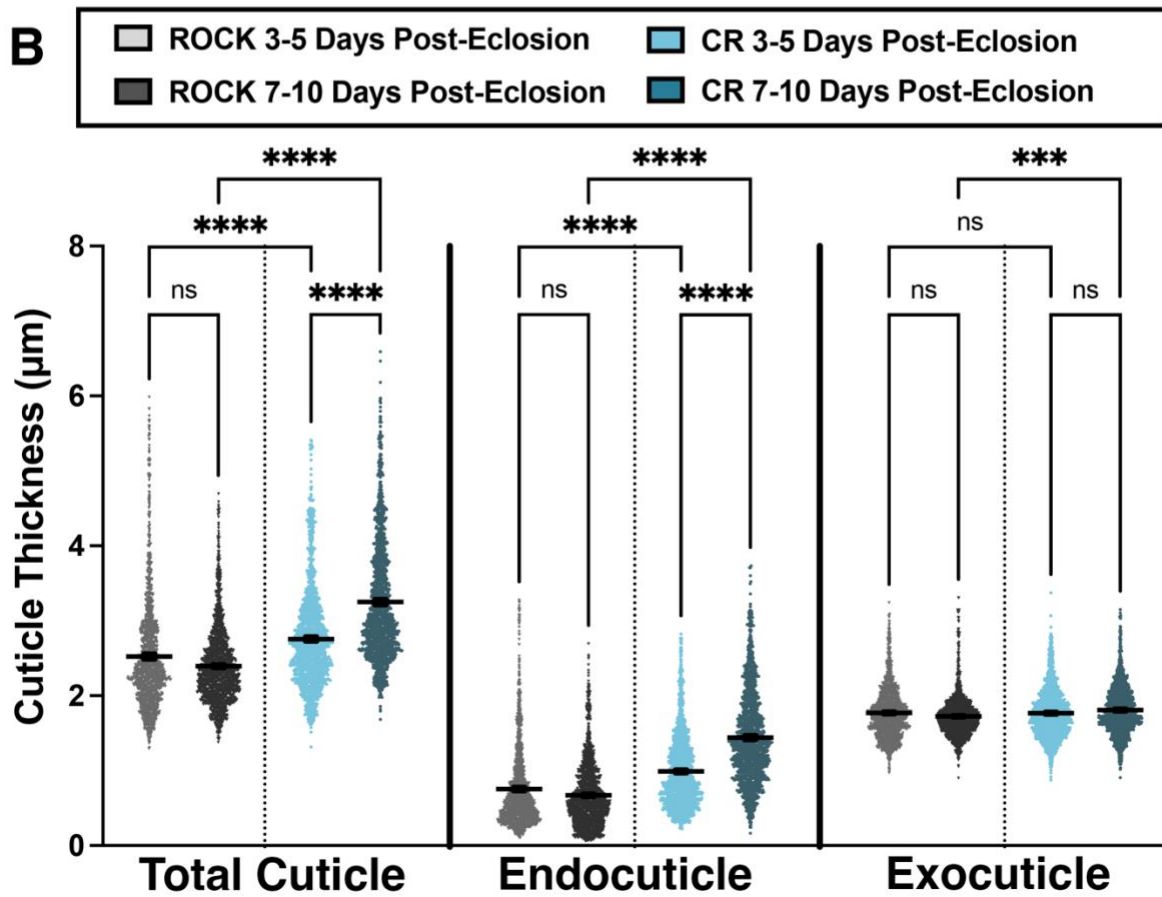

302 **Figure 3: Time-course measurements of insecticide resistant and susceptible *Ae. aegypti* cuticular**  
303 **thickness.**

304 **A:** TEM images of 7–10 d ROCK (left) and CR (right) femurs indicating the exocuticle (red) and  
305 endocuticle (black). **B:** Cuticle measurements taken from cross sections of CR and ROCK female  
306 mosquito femurs both 3-5 d and 7-10 d post-eclosion. Data represent measurements from 10  
307 femurs per strain per time point (40 total femurs) with 10 representative images analyzed per  
308 female. A minimum of 10 total cuticle, exocuticle, and endocuticle measurements were taken per  
309 image. Mean and 95% CI are shown on the graph. 3-5 d post-eclosion ROCK (light grey) N = 1,534  
310 measurements; 3-5 d post-eclosion CR (light blue) N = 1,525 measurements. 7-10 d post-eclosion  
311 ROCK (dark grey) N = 1,688 measurements; 7-10 d post-eclosion CR (dark blue) N = 1,461  
312 measurements. Kruskal-Wallis Test with Dunn's multiple comparison. \*\*\*\* = <0.0001 \*\*\* =  
313 0.0002.

314

315 **GC-MS analysis of cuticular hydrocarbons from CR and ROCK males and females**

316 Increased abundance of cuticular lipids is correlated with insecticide resistance in the lab and field  
317 [46]. In the acid-resistant material of the insecticide resistant strain, we noted that the relative  
318 increase of the polysaccharide NMR spectral region coincided with a relative decrease in the lipid  
319 region. We were curious if this would correspond to a decrease in cuticular lipids. To investigate  
320 the abundance and composition of CR and ROCK cuticular hydrocarbon materials, we extracted  
321 the hydrocarbons from 3-5 d old CR and ROCK males and females. Hexane extractions were  
322 performed on groups of 20 pooled mosquitoes per extraction with an internal pentadecane  
323 standard. Samples were collected from three separate rearing cohorts. Total mosquitoes were as  
324 follows: ROCK females n = 180, ROCK males n = 140, CR females n = 140, CR males = 180. To  
325 estimate cuticular hydrocarbon (CHC) abundance, samples were referenced to the internal  
326 pentadecane standard. Total abundances were estimated from the sum of peak areas and divided  
327 by sample mass. GC-MS analysis of the extractions found that males and females of the ROCK and  
328 CR strains had similar alkane composition (Fig. 4A, 4B) and total abundance of CHCs (Fig. 4C).

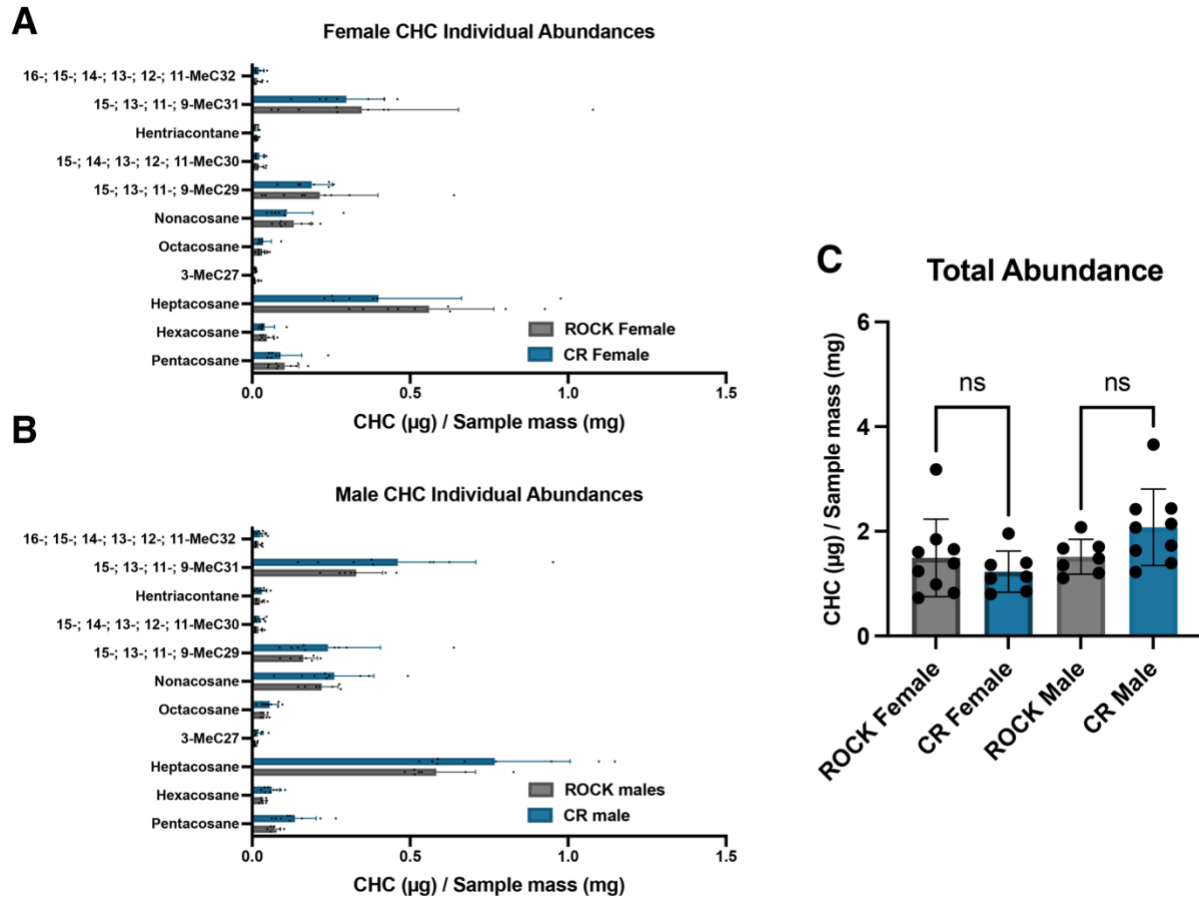

329  
330  
331  
332  
333  
334  
335  
336  
337  
338

**Figure 4: Cuticular hydrocarbon abundance and composition of resistant and susceptible *Ae. aegypti* males and females.**

**A:** Abundances of cuticular alkanes extracted from ROCK (grey) and CR (blue) females identified with GC-MS. Error bars represent mean with SD. **B:** Abundances of cuticular alkanes extracted from ROCK (grey) and CR (blue) males identified with GC-MS. Error bars represent mean with SD. **C:** Abundances of cuticular hydrocarbons extracted from ROCK (grey) and CR (blue) females and males estimated by summing peak area and adjusting by sample weight. All data points represent abundances from extractions of groups of 20 whole mosquitoes from 3 separate rearing cohorts.

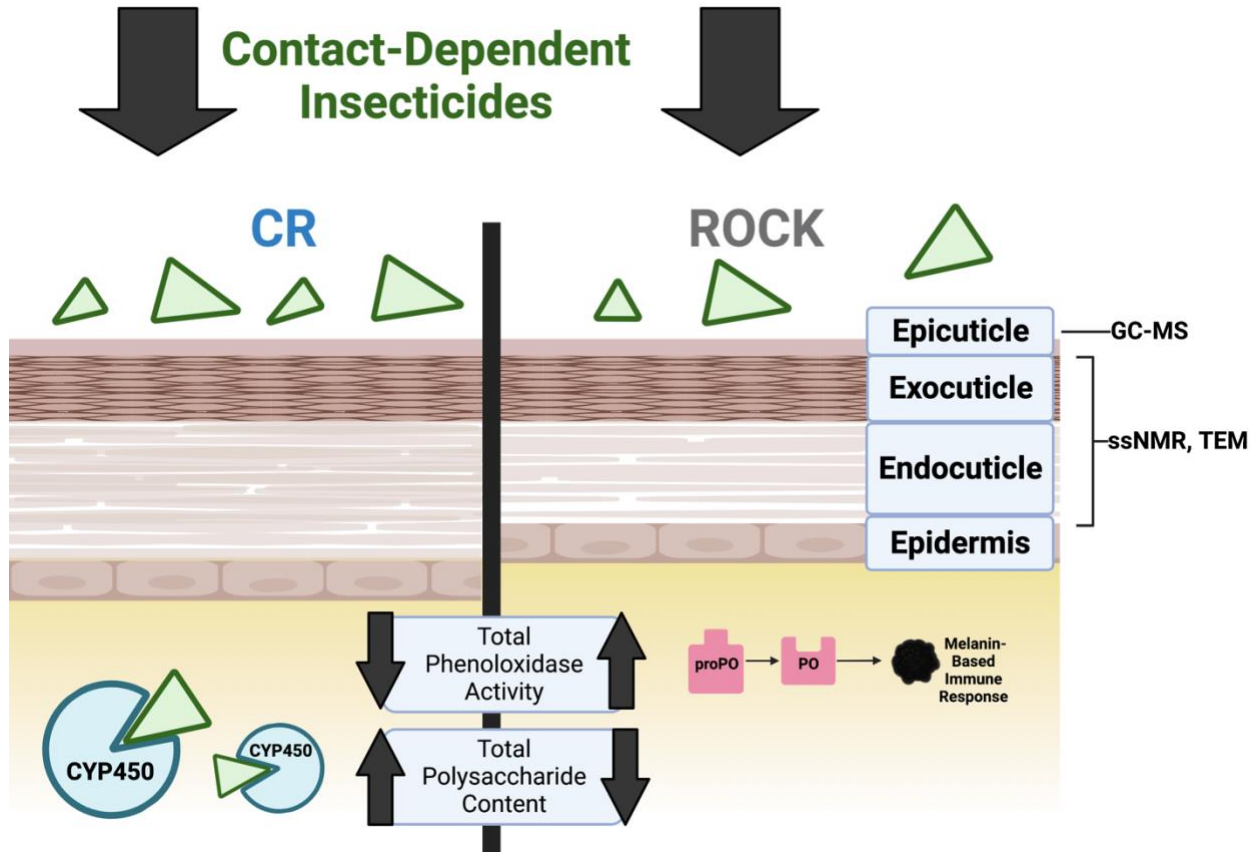

339  
340  
341  
342

Figure 5: Schematic of cuticular structure and summary of methods used.  
Figure adapted from: Balabanidou et. al, 2018 [18]. Created with BioRender.com.



343

## 344 Discussion

345 Cuticular insecticide resistance refers to insect cuticle alterations that reduce insecticide  
346 penetration, simultaneously limiting internal damage and increasing efficacy of internal  
347 physiological resistance mechanisms such as CYP enzyme detoxification and insecticide target-site  
348 mutations conferring KDR phenotypic resistance [18]. Compared to internal physiological  
349 mechanisms, cuticular resistance is much less well understood. Insect cuticle is essential for  
350 structural integrity, barrier protection, sensation, hydration, and chemical communication [19,  
351 20]. Therefore, cuticular alterations may have unanticipated consequences in other aspects of  
352 insect physiology that require further study. Notably, past studies examining cuticular resistance  
353 have compared unrelated strains or strains with undefined resistance mechanisms. Comparing  
354 congeneric strains that differ only in the trans-regulation of CYP gene overexpression supports the  
355 premise that our findings are related, either directly or indirectly, to the defined CYP-mediated  
356 resistance mechanisms and not purely a result of the genetic background. Previously, the SP strain,  
357 which possesses both a KDR resistance loci and the same metabolic resistance loci also present in  
358 the CR strain, was found to not be resistant to radiolabeled permethrin penetration after  
359 application to the notum [16]. However, this work did not characterize cuticle ultrastructure or  
360 composition [16]. Interactions between KDR and CYP resistance loci have been shown to impact  
361 physiology and influence fitness-costs [48, 49]. This is the case in the strain used in this study;  
362 isolation of the CR strain's resistance loci from the KDR resistance loci resulted in greater fitness  
363 costs associated with CYP-resistance, including a reduced lifespan [49]. Therefore, it is possible  
364 that the cuticular changes we observed are related to the overexpression of CYP genes or  
365 associated with the isolation of the resistance loci in the CR strain. Future work comparing the  
366 cuticles of congeneric strains with dual and isolated resistance loci would begin to answer these  
367 questions.

368 As noted previously, the cuticle is comprised of cuticular hydrocarbon-based waxes, chitin  
369 polysaccharides, cuticular proteins, and the phenolic biopolymers sclerotin and melanin. In  
370 contrast to other cuticular constituents, the contributions of sclerotin and melanin to cuticular  
371 resistance have been unexplored. This is primarily due to their relatively low abundance in the  
372 cuticle and amorphous structure. Within the cuticle, moreover, sclerotin and melanin are attached  
373 to other moieties via strong covalent bonds and are resistant to acid digestion [25, 57, 63]. In fungi,  
374 analysis of acid resistant material makes it possible to characterize not only fungal melanin, but  
375 components protected by melanin [55, 60, 64-66]. Adapting acid-digestion protocols used for  
376 fungal melanin enrichment allowed us to characterize the abundance and composition of  
377 associated material in the resistant cuticle [67]. While ssNMR comparison of ROCK and CR acid-  
378 resistant material showed no differences in melanin and sclerotin deposition correlating with CR  
379 resistance at baseline, the strains were not pre-exposed to insecticides. Therefore, the possibility  
380 that melanin or other phenolic compounds play a role in detoxification during direct exposure  
381 cannot be excluded.

382 Sclerotin and melanin play vital roles in several essential physiological processes including  
383 coloration, cuticular structural integrity, immunity, and wound healing [25-29]. Melanin produced  
384 by phenoloxidase is especially important in the insect immune response [26, 28, 29, 33].  
385 Phenoloxidases exhibit broad substrate specificity and are able to metabolize a wide variety of  
386 phenolic-containing compounds, such as those secondary metabolites produced by plants, which

387 are in turn toxic to insects if ingested in sufficient quantities [34, 35]. As such, these enzymes have  
388 a proposed role in detoxification in addition to immunity. Prior studies have demonstrated a  
389 potential link between increased phenoloxidase activity and insecticide resistant lab strains of the  
390 common house mosquito, *Culex pipiens*, although this trend was not apparent in resistant field  
391 populations [52, 53]. In contrast with the *C. pipiens* lab strains, our observation that the total  
392 phenoloxidase activity (estimated by  $\alpha$ -chymotrypsin activation) was significantly decreased in the  
393 CR strain does not support the notion that phenoloxidases are playing a major role in  
394 detoxification. However, the biological relevance of this decrease during immune challenge is  
395 unknown.

396 Whereas ssNMR analysis of the acid-resistant material ruled out increased deposition of  
397 phenolic groups in the cuticle, it revealed higher relative polysaccharide content in the CR strain.  
398 The primary polysaccharide contributor could be identified as chitin, a premise supported because  
399 of acid resistance conferred by this material's crosslinking ability to other cuticular moieties [30,  
400 57-59, 61] and characteristic 55-ppm NMR resonance from the C2 ring carbon that is amide  
401 bonded to an acetyl group. This signal was clearly observed to display greater intensity in the CR  
402 sample spectrum (Fig. 1D inset). Nonetheless, it was unknown whether this increase in chitin  
403 corresponded to increased cuticle thickness, a commonly observed phenotype of cuticular  
404 resistance. By comparing the leg femur thickness of the CR insecticide-resistant *Ae. aegypti* strain  
405 to the congenic susceptible ROCK strain, we were able to demonstrate time-dependent cuticular  
406 thickening in the CR strain. CR females had significantly larger total cuticle and endocuticle  
407 thickness at both time points. Interestingly, the endocuticle thickness of CR females increased over  
408 time. Due to the timing of exocuticle formation, exocuticle thickness could serve as an internal  
409 control for consistent TEM sectioning location; the exocuticle thickness did not increase  
410 significantly over time in either strain.

411 Increased epicuticular hydrocarbon deposition is another documented cuticular resistance  
412 phenotype [44, 46, 47]. In contrast with the literature, GC-MS profiling of hexane-extracted  
413 hydrocarbons from 3–5-day-old males and females of both strains showed no significant  
414 differences in total cuticular hydrocarbon abundance or any identified individual alkanes.  
415 Nonetheless, we observed significant variability between samples, attributable to the three  
416 separate rearing cohorts, that rendered these comparisons challenging. To put these findings into  
417 context, it should be noted that several families of CYP genes are known to contribute to metabolic  
418 resistance. Populations of *An. arabiensis* and *An. gambiae* with overexpression of *CYP4G16* and  
419 *CYP4G17* exhibit increased cuticular hydrocarbon deposition associated with insecticide resistance  
420 and mating success [44, 46, 68]. Consistent with this literature, the insecticide resistant *Ae. aegypti*  
421 CR strain used in this study relies on overexpression of genes in the families CYP6 and CYP9, and  
422 not on CYP4G subfamily overexpression for conferral of synthetic pyrethroid resistance [69].

423 Although we observed no difference in cuticular hydrocarbon abundance, these lipids are  
424 known to play a role in mating of many insect species [46, 70, 71]. Previous work has demonstrated  
425 a mating defect associated with the resistance locus of the CR strain [49]. In a mating competition  
426 assay using congenic strains, susceptible ROCK males were more successful at mating with fellow  
427 susceptible ROCK females than males that exhibited both *kdr* and CYP resistance mechanisms [49].  
428 Conversely, resistant females showed no preference between resistant and susceptible males  
429 [49]. Taken together, these results indicate that CYP resistance mechanisms may both reduce male  
430 mating fitness and alter the ability of resistant females to distinguish between potential mates

431 [49]. In *Ae. aegypti*, the cuticle is an essential interface for chemosensory communication during  
432 mating and female choice is a primary driver of mating success [72, 73]. Recent work in *Ae. aegypti*  
433 has demonstrated that cuticular contact during mating induces chemosensory gene expression  
434 changes that are important in mate choice [73]. Due to the importance of cuticular contact in  
435 mating, the cuticular thickening we observed in the CR strain may reduce or alter chemosensory  
436 communication during mating, contributing to the mating defects associated with this metabolic  
437 resistance loci in lieu of hydrocarbon differences.

438 ssNMR has been performed previously on whole mosquitoes to show global metabolic  
439 changes [62]. As the CR strain is metabolically insecticide resistant, we aimed to gain more detailed  
440 insights into the cellular architecture and overall molecular composition of the whole mosquito by  
441 probing for global spectral changes. When we performed ssNMR analysis on intact female  
442 mosquitoes, the CR strain exhibited a marginally greater polysaccharide content in comparison to  
443 ROCK. We observed the same trend when comparing the polysaccharide content of acid-resistant  
444 material yielded by the two strains. In contrast to acid-resistant material, whole organisms contain  
445 a wide variety of polysaccharides that exhibit only minor differences in chemical shift, which  
446 results in significant spectral overlap and thus precludes the identification of specific types of  
447 polysaccharides. Therefore, it cannot be ruled out that the marginally greater polysaccharide  
448 content of CYP whole mosquitoes is reflective of the increased chitin content observed in the acid-  
449 resistant material.

450 Alternatively, it is possible that CR mosquitoes exhibit an increase in polysaccharide content  
451 as a direct result of CYP gene overexpression. In insects, a well-established mechanism of  
452 detoxification is the conjugation of xenobiotics to glucose by glucosyl transferases [68]. The  
453 proposed mechanism of CYP resistance in this strain is the hydroxylation of aromatic ring carbons  
454 of pyrethroids; the hydroxylated compounds are further conjugated with glucosides or amino  
455 acids to mediate excretion of these polar secondary metabolites [16, 74]. Thus, this detoxification  
456 mechanism requires the availability of readily mobilizable carbohydrate reserves, which could  
457 potentially contribute to the increased polysaccharide content observed in this strain.

458 In addition to the overall increase of relative NMR signal intensity in the polysaccharide region,  
459 the CR spectrum displayed a prominent sharp peak at ~50 ppm that was not observed in the ROCK  
460 spectrum. CYPs participate in the detoxification of xenobiotics such as chemical insecticides (e.g.,  
461 pyrethroids) via the hydroxylation of key sites, which increases their polarity and in turn promotes  
462 their excretion. Metabolically resistant mosquitoes exhibit constitutive overexpression of CYPs;  
463 thus, when reared in a lab setting in the absence of any xenobiotics, increased CYP activity could  
464 result in the hydroxylation of structurally similar non-toxic moieties. Although not fully  
465 understood, CYPs and other downstream detoxifying enzymes are thought to preferentially  
466 hydroxylate the arene and aliphatic carbons of pyrethroids [75]. Depending on the local chemical  
467 environment, certain hydroxylated aliphatic carbons resonate at ~50 ppm and thus could plausibly  
468 explain the unique appearance of this peak in the CR whole mosquito spectrum.

469 Further comparison of the CR and ROCK whole-mosquito data revealed additional spectral  
470 differences which could potentially reflect a difference in metabolic state between the two strains.  
471 Namely, there are two sharp signals at ~180 and 130 ppm that are of greater intensity in the ROCK  
472 spectrum. The peaks at 180 and 130 ppm are characteristic of rapidly-tumbling unsaturated free  
473 fatty acids found in fat bodies [76-78]: the signal at 180 ppm is unambiguously attributable to the  
474 carbon within a carboxylic acid group of an unesterified fatty acid [76, 79], whereas the signal at

475 130 ppm is attributable to the olefinic carbons of fatty acids containing at least one point of  
476 unsaturation [76, 79], which are predominant in fat bodies [80] and preferentially liberated from  
477 triacylglycerols as compared with saturated fatty acids [81]. Taken together, our data suggest that  
478 ROCK mosquitoes have a greater content of free fatty acids in comparison to the CYP strain.  
479 Notably, these differences in free fatty acid peak intensities were not observed in the spectra of  
480 the acid-resistant material, which suggests they reflect a change in global metabolism rather than  
481 a change in cuticular molecular architecture. Free fatty acids are an important energy source in  
482 insect metabolism [69]; they are stored in fat bodies in the form of triacylglycerols and are  
483 liberated immediately prior to utilization for energy production. Thus, the comparatively lower  
484 content of fatty acids observed in CR mosquitoes offers evidence of the high energetic cost of  
485 maintaining CYP resistance [82, 83]. The high energy demands of the CYP strain and  
486 overexpression of detoxification mechanisms are likely to require mobilization of carbohydrate  
487 reserves, resulting in chitin production and therefore causing cuticle thickening to correlate with  
488 metabolic resistance. We hypothesize that global metabolic changes impacting carbohydrate  
489 metabolism contribute indirectly to the cuticular alterations often observed in resistant strains,  
490 rather than a distinct selected phenomenon. Indeed, our observation of endocuticle thickening  
491 over time supports this notion.

492 Our work profiling the contributions of polysaccharide, lipid, and phenolic biopolymers to  
493 cuticular resistance revealed cuticular changes in the CR strain. While TEM allowed us to monitor  
494 the cuticle ultrastructure for differences, a combination of solid-state Nuclear Magnetic  
495 Resonance (ssNMR) and Gas Chromatography Mass Spectrometry (GC-MS) yielded insights into  
496 cuticular composition. We were additionally able to rule out baseline differences in both cuticular  
497 hydrocarbons and phenolic biopolymer deposition between CR and ROCK. However, we observed  
498 endocuticular thickening over time and an associated increased polysaccharide content in both  
499 acid-resistant cuticular material and whole CR mosquito. Nevertheless, the ability of cuticle  
500 alterations to act synergistically with other resistance mechanisms and impact important  
501 processes such as mating emphasizes the importance of better understanding the biomolecules  
502 that contribute to cuticular insecticide resistance in *Ae. aegypti* and related vectors that jeopardize  
503 human health.

504  
505

## 506 **Acknowledgements**

507 We thank Barbara Smith of the Johns Hopkins Microscope Core Facility for expert assistance with  
508 TEM imaging and sample sectioning. Thank you to Scott Lab members Juan Silva and Cera Fisher  
509 for sending the CR strain. We are grateful to Doug Norris for manuscript advice and  
510 encouragement. We appreciate the help of Quigly Dragotakes and Daniel Smith in manuscript  
511 editing.

512

## 513 **Funding Acknowledgements**

514 This work was supported by the National Institutes of Health, grant number R01-AIxxxxyy (E.J.,  
515 OTHERS, A.C.). E.J. was also supported by the National Institutes of Health, grant number T32-  
516 AI138953-03. C.C. was also supported by the Brescia Fund of the Department of Chemistry and  
517 Biochemistry at The City College of New York.

518

519 **Author contributions**

520 E.J: conceptualization, methodology, validation, formal analysis, investigation, writing- original  
521 draft, writing-review and editing, visualization. C.C: methodology, validation, formal analysis,  
522 investigation, writing- original draft, writing-review and editing, visualization. S.R.T:  
523 methodology, validation, formal analysis, investigation, writing-review and editing, visualization.  
524 M.W: supervision, project administration, writing-review, and editing. E.C: methodology, writing-  
525 review, and editing. J.G.S: Resources, supervision, writing-review, and editing. N.A.B: Resources,  
526 supervision, writing-review, and editing. C.J.M: Resources, supervision, validation, writing-  
527 review, and editing. R.E.S: Resources, supervision, writing-review and editing, and funding  
528 acquisition. A.C: conceptualization, supervision, project administration, resources, supervision,  
529 writing-review and editing, and funding acquisition.

530

531 **Competing Interests Statement**

532 The author(s) declare no competing interests.

533

534

## 535 **Methods**

### 536 **Mosquito strains**

537 The congenic *Ae. aegypti* CR and ROCK strains used in this study were produced and supplied by  
538 Dr. Jeff Scott's laboratory at Cornell University (Ithaca, New York). CYP resistance alleles originating  
539 from the resistant Singapore (SP) strain were introgressed into the ROCK background to produce  
540 a strain with only CYP-mediated resistance that was congenic to the well characterized insecticide  
541 susceptible Rockefeller (ROCK) strain [17, 49, 84, 85].

542

### 543 **Mosquito rearing**

544 The *Ae. aegypti* CR and ROCK strains were maintained with a 12 h light:dark photoperiod at 27°C  
545 and 80% relative humidity. Larvae were fed 1 pellet of Cichlid Gold® Fish Food (Hikari, Himeji,  
546 Japan) per 50 larvae [69]. Eggs were vacuum hatched in a 1L flask in diH<sub>2</sub>O for 30 minutes to  
547 maximize synchronized development. After 24 h, larvae were sorted to a density of 200 larvae/1  
548 L of diH<sub>2</sub>O. After eclosion, mosquitoes were maintained on 10% sucrose using cotton wicks.

549

### 550 ***Drosophila melanogaster* strains and rearing**

551 The *D. melanogaster* strains used in this study, WT- CantonS (BDSC 64349), ebonyS (BDSC 498),  
552 and *yw* (BDSC 1495) were obtained from the Bloomington Drosophila Stock Center (Bloomington,  
553 IN). All *D. melanogaster* strains were maintained on our standard fly food [86] on a 12 h light:dark  
554 photoperiod at 25°C and 80% relative humidity. Adult flies (4-7 day old) were collected and sexed  
555 for further processing. Acid-resistant material was collected from groups of 25 homogenized  
556 female flies. Samples were homogenized in 500 µL diH<sub>2</sub>O using an electric pellet pestle cordless  
557 motor (Kimble). After homogenization, 500 µL of 12M HCl was added to the homogenate (6M final  
558 concentration). Samples were digested for 24 hours on an Eppendorf ThermoMixer C shaker at  
559 85°C with 700 RPM shaking. After digestion, samples were spun down for 30 minutes at room  
560 temperature at 15,000 RCF. Samples were washed three times, first with 1 mL 1X PBS, then 1 mL  
561 10% PBS, and finally 1 mL diH<sub>2</sub>O. Washed melanin samples were lyophilized, weighed, and  
562 combined for ssNMR analysis.

563

564

### 565 **Phenoloxidase activity**

566 To measure phenoloxidase activity, single mosquitoes were crushed in 35 µL of cold PBS using an  
567 electric pellet pestle cordless motor (Kimble) with ScienceWare Disposable Polypropylene Pestles  
568 (VWR Catalogue # 66001-104). After a 2-minute 3,000 RPM spin at 4°C, 15 µL of hemolymph  
569 homogenate was recovered and frozen on dry ice for 2 minutes for hemocyte lysis. Samples were  
570 stored at -80°C until analysis. Hemolymph homogenate samples were thawed on ice. In a  
571 transparent, flat bottom 96-well plate 5 µL of hemolymph homogenate was mixed with 20 µL PBS,  
572 20 µL 20 mM L-DOPA (4mg/mL) (3,4-Dihydroxy-L-phenylalanine, Sigma Catalogue # D9628-25G),  
573 and 140 µL diH<sub>2</sub>O with or without 0.07 mg/mL *α*-chymotrypsin (Worthington Biochemical, Catalog  
574 #LS001432). Melanization activity was determined through SpectraMax iD5 spectrophotometer  
575 readings at 492 nm 30°C for 45 minutes with 1 reading/minute [53].

576

### 577 **Acid digestion and mosquito weights**

578 Female mosquitoes were collected 5-7 d post-eclosion and weighed in groups of 25 in 1.5 mL  
579 microcentrifuge tubes. The weight of single mosquitoes was estimated from these measurements  
580 to reduce error. To obtain acid resistant material, 25 female mosquitoes were homogenized in  
581 500  $\mu$ L diH<sub>2</sub>O using an electric pellet pestle cordless motor (Kimble). After homogenization, 500  
582  $\mu$ L of 12M HCl was added to the homogenate (6M final concentration). Samples were digested for  
583 24 hours on an Eppendorf ThermoMixer C shaker at 85°C with 700 RPM shaking. After digestion,  
584 samples were spun down for 30 minutes at room temperature at 15,000 RCF. Samples were  
585 washed three times, first with 1 mL 1X PBS, then 1 mL 10% PBS, and finally 1 mL diH<sub>2</sub>O. Washed  
586 melanin samples were lyophilized, weighed, and combined for ssNMR analysis.

587

### 588 **Solid-state NMR spectroscopy.**

589 Solid-state NMR experiments were conducted on a Varian (Agilent) DirectDrive2 (DD2)  
590 spectrometer operating at a <sup>1</sup>H frequency of 600 MHz and equipped with a 1.6-mm T3 HXY  
591 fastMAS probe (Agilent Technologies, Santa Clara, CA); all measurements were carried out using  
592 a magic-angle spinning (MAS) rate of 15.00  $\pm$  0.02 kHz at a spectrometer-set temperature of 25  
593 °C. Data were obtained on ~X-Y mg of lyophilized sample mass yielded by HCl hydrolysis of each  
594 CR and ROCK female mosquitoes to analyze the acid-resistant material. To analyze the whole  
595 mosquitos, data were obtained on 20 intact lyophilized female mosquitoes from either the CR or  
596 ROCK strain, equivalent to approximately XYZ mg. Both sets of samples were examined using <sup>13</sup>C  
597 direct-polarization (DPMAS) experiments conducted with 90° pulse lengths of 1.2 and 1.4  $\mu$ s for  
598 <sup>1</sup>H and <sup>13</sup>C, respectively; 104-kHz heteronuclear decoupling using the small phase incremental  
599 alternation pulse sequence (SPINAL) was applied during signal acquisition. The DPMAS  
600 experiments used a long recycle delay (50-s) to generate spectra with quantitatively reliable signal  
601 intensities. Thus, the relative amounts of carbon-containing constituents present in the samples  
602 could be estimated using the GNU image manipulation program (GIMP) by measuring the  
603 integrated signal intensity within the spectral region corresponding to each moiety and comparing  
604 it to the total integrated signal intensity of the spectrum.

605

### 606 **TEM sectioning and image analysis**

607 Groups of 10 midlegs were removed from ROCK and CR females of the same rearing cohort at 3-  
608 5 d post-eclosion and 7-10 d post-eclosion (40 total midlegs). Midlegs were severed at the tibia  
609 just after the femur with a razor blade and were fixed in 2.5% glutaraldehyde, 3 mM MgCl<sub>2</sub>, and  
610 0.1 M sodium cacodylate (pH 7.2) overnight at 4 °C.

611

612 After buffer rinse, samples were postfixed in 1% osmium tetroxide, 1.25% potassium ferrocyanide  
613 in 0.1 M sodium cacodylate for at least 1 h (no more than two) on ice in the dark. After the fixing  
614 step, samples were rinsed in dH<sub>2</sub>O, followed by uranyl acetate (2%, aq.) (0.22  $\mu$ m filtered, 2.5 h,  
615 dark), dehydrated in a graded series of ethanol and embedded in Spurr's (Electron Microscopy  
616 Sciences) resin. Samples were polymerized at 60 °C overnight. Thin sections, 60 to 90 nm, were  
617 cut with a diamond knife on a Leica UCT ultramicrotome and picked up with 2  $\times$  1 mm Formvar  
618 copper slot grids. **To obtain consistent comparable segments across samples, femur cross-sections**  
619 **were obtained 200 nm into the femur from the direction of the tibia.** Grids were stained with 2%  
620 aqueous uranyl acetate followed by lead citrate and observed with a Hitachi 7600 TEM at 80 kV.

621 Images were captured at 10,000X magnification using an AMT CCD XR80 (8-megapixel side mount  
622 AMT XR80 high-resolution, high-speed camera).

623  
624 Ten representative images were chosen per femur. Each image captured ~18  $\mu\text{m}$  of total cuticle  
625 length.  $\leq 10$  measurements were taken per image using ImageJ2 version 2.30/1.53f.  
626 Measurements of total cuticle and endocuticle were taken at the same point and exocuticle was  
627 calculated by subtracting these values. Areas of the cuticle containing structural modifications  
628 were excluded from measurements.

629  
630 **Cuticular hydrocarbon extraction**  
631 Pools of 20 mosquitoes were collected at 3-5 d post-eclosion, weighed, and stored in glass vials at  
632  $-20^{\circ}\text{C}$  until sample processing. Samples were collected from three separate rearing cohorts. The  
633 pools of 20 mosquitoes were submerged for 30 min in 400  $\mu\text{L}$  GC-MS quality hexane and 16  
634  $\mu\text{g}/\text{sample}$  pentadecane internal standard. Each extraction was purified through a column  
635 chromatography quality Silica gel (Pore Size 60  $\text{\AA}$  0.063-0.200 mm) to final a volume of 1.5 mL of  
636 hexane and evaporated with  $\text{N}_2$  gas. After evaporation, samples were frozen at  $-20^{\circ}\text{C}$  until further  
637 analysis.

638  
639 **GC-MS Analysis**  
640 Samples were analyzed by gas chromatography/mass spectrometry (7890B GC, 5977N MSD,  
641 Agilent, USA). Concentrated hydrocarbons were resuspended in 30  $\mu\text{L}$  of hexane and 1  $\mu\text{L}$  of each  
642 sample was injected onto a HP-5MS capillary column (30 m length x 25 mm diameter x 0.25  $\mu\text{m}$   
643 film thickness). The GC oven was programmed with an initial temperature of  $50^{\circ}\text{C}$  with a 2 min  
644 hold followed by an increase of  $20^{\circ}\text{C}/\text{min}$  to  $300^{\circ}\text{C}$  with a 6 min hold. A helium carrier gas with a  
645 flow rate of  $1.2 \text{ mL}/\text{min}^{-1}$  was used. The MS analyzer was set to acquire over a range of  $m/z$  35-  
646 500 and was operated in EI mode. The ion source and transfer line were set to  $230^{\circ}\text{C}$  and  $300^{\circ}\text{C}$   
647 respectively. Analyte peak areas were normalized to the internal standard and by sample weights.  
648 Compound identification was achieved by comparison of mass spectra with the NIST Mass Spectral  
649 Library version 2.2 and retention time matching with analytical reference standards.

650  
651 **Statistical analysis**  
652 Data were analyzed with Prism Version 9.3.1. Figure 1A left: The data were normally distributed  
653 (Shapiro-Wilk test) and a two-tailed unpaired t-test was performed. Figure 1A right: The data were  
654 not normally distributed (Shapiro-Wilk test) and a two-tailed Mann-Whitney test was performed.  
655 Figure 1B: The data were normally distributed (Shapiro-Wilk test) and a two-tailed unpaired t-test  
656 was performed. Figure 2A: The data were not normally distributed (Shapiro-Wilk test) and a two-  
657 tailed Mann-Whitney test was performed. Figure 3B: The data were not normally distributed  
658 (Kolmogorov–Smirnov test) and a Kruskal-Wallis test with Dunn’s multiple comparisons test was  
659 performed with 12 comparisons.

660  
661  
662



663

664

- 665 1. Vega-Rúa, A., et al., *Chikungunya virus transmission potential by local Aedes mosquitoes*  
666 *in the Americas and Europe*. PLoS Negl Trop Dis, 2015. **9**(5): p. e0003780.
- 667 2. Shepard, D.S., et al., *The global economic burden of dengue: a systematic analysis*.  
668 *Lancet Infect Dis*, 2016. **16**(8): p. 935-41.
- 669 3. Bhatt, S., et al., *The global distribution and burden of dengue*. *Nature*, 2013. **496**(7446):  
670 p. 504-7.
- 671 4. Messina, J.P., et al., *The current and future global distribution and population at risk of*  
672 *dengue*. *Nature Microbiology*, 2019. **4**(9): p. 1508-1515.
- 673 5. Marcombe, S., et al., *Pyrethroid resistance reduces the efficacy of space sprays for*  
674 *dengue control on the island of Martinique (Caribbean)*. PLoS Negl Trop Dis, 2011. **5**(6):  
675 p. e1202.
- 676 6. Maciel-de-Freitas, R., et al., *Undesirable consequences of insecticide resistance following*  
677 *Aedes aegypti control activities due to a dengue outbreak*. PLoS One, 2014. **9**(3): p.  
678 e92424.
- 679 7. Moyes, C.L., et al., *Contemporary status of insecticide resistance in the major Aedes*  
680 *vectors of arboviruses infecting humans*. PLoS Negl Trop Dis, 2017. **11**(7): p. e0005625.
- 681 8. Rahman, R.U., et al., *Insecticide resistance and underlying targets-site and metabolic*  
682 *mechanisms in Aedes aegypti and Aedes albopictus from Lahore, Pakistan*. *Scientific*  
683 *Reports*, 2021. **11**(1): p. 4555.
- 684 9. Zalucki, M.P. and M.J. Furlong, *Behavior as a mechanism of insecticide resistance:*  
685 *evaluation of the evidence*. *Current Opinion in Insect Science*, 2017. **21**: p. 19-25.
- 686 10. Sparks, T.C., et al., *The role of behavior in insecticide resistance*. *Pesticide Science*, 1989.  
687 **26**(4): p. 383-399.
- 688 11. Scott, J.G. *Investigating Mechanisms of Insecticide Resistance: Methods, Strategies, and*  
689 *Pitfalls*. 1990.
- 690 12. Ingham, V.A., et al., *A sensory appendage protein protects malaria vectors from*  
691 *pyrethroids*. *Nature*, 2020. **577**(7790): p. 376-380.
- 692 13. Ensley, S.M., *Chapter 39 - Pyrethrins and Pyrethroids*, in *Veterinary Toxicology (Third*  
693 *Edition)*, R.C. Gupta, Editor. 2018, Academic Press. p. 515-520.
- 694 14. Dong, K., et al., *Molecular biology of insect sodium channels and pyrethroid resistance*.  
695 *Insect Biochem Mol Biol*, 2014. **50**: p. 1-17.
- 696 15. Hemingway, J., et al., *The molecular basis of insecticide resistance in mosquitoes*. *Insect*  
697 *Biochem Mol Biol*, 2004. **34**(7): p. 653-65.
- 698 16. Kasai, S., et al., *Mechanisms of pyrethroid resistance in the dengue mosquito vector,*  
699 *Aedes aegypti: target site insensitivity, penetration, and metabolism*. PLoS Negl Trop Dis,  
700 2014. **8**(6): p. e2948.
- 701 17. Smith, L.B., et al., *CYP-mediated resistance and cross-resistance to pyrethroids and*  
702 *organophosphates in Aedes aegypti in the presence and absence of kdr*. *Pestic Biochem*  
703 *Physiol*, 2019. **160**: p. 119-126.
- 704 18. Balabanidou, V., L. Grigoraki, and J. Vontas, *Insect cuticle: a critical determinant of*  
705 *insecticide resistance*. *Current Opinion in Insect Science*, 2018. **27**: p. 68-74.
- 706 19. WIGGLESWORTH, V.B., *THE INSECT CUTICLE*. *Biological Reviews*, 1948. **23**(4): p. 408-451.

- 707 20. Vincent, J.F.V., *Arthropod cuticle: a natural composite shell system*. Composites Part A:  
708 Applied Science and Manufacturing, 2002. **33**(10): p. 1311-1315.
- 709 21. Fine, B.C., P.J. Godin, and E.M. Thain, *Penetration of Pyrethrin I labelled with Carbon-14*  
710 *into Susceptible and Pyrethroid Resistant Houseflies*. Nature, 1963. **199**(4896): p. 927-  
711 928.
- 712 22. Forgash, A.J., B.J. Cook, and R.C. Riley, *Mechanisms of Resistance in Diazinon-Selected*  
713 *Multi-Resistant Musca domestica*<sup>1</sup>. Journal of Economic Entomology, 1962. **55**(4): p.  
714 544-551.
- 715 23. Andersen, S.O., *Biochemistry of Insect Cuticle*. Annual Review of Entomology, 1979.  
716 **24**(1): p. 29-59.
- 717 24. Muthukrishnan, S., et al., *Insect Cuticular Chitin Contributes to Form and Function*.  
718 Current pharmaceutical design, 2020. **26**(29): p. 3530-3545.
- 719 25. Sugumaran, M., *Molecular mechanisms for mammalian melanogenesis. Comparison*  
720 *with insect cuticular sclerotization*. FEBS Lett, 1991. **295**(1-3): p. 233-9.
- 721 26. Christensen, B.M., et al., *Melanization immune responses in mosquito vectors*. Trends in  
722 Parasitology, 2005. **21**(4): p. 192-199.
- 723 27. Whitten, M.M.A. and C.J. Coates, *Re-evaluation of insect melanogenesis research: Views*  
724 *from the dark side*. Pigment Cell & Melanoma Research, 2017. **30**(4): p. 386-401.
- 725 28. Nappi, A.J. and B.M. Christensen, *Melanogenesis and associated cytotoxic reactions:*  
726 *applications to insect innate immunity*. Insect Biochem Mol Biol, 2005. **35**(5): p. 443-59.
- 727 29. Sugumaran, M., *Comparative biochemistry of eumelanogenesis and the protective roles*  
728 *of phenoloxidase and melanin in insects*. Pigment Cell Res, 2002. **15**(1): p. 2-9.
- 729 30. Duplais, C., et al., *Gut bacteria are essential for normal cuticle development in*  
730 *herbivorous turtle ants*. Nature Communications, 2021. **12**(1): p. 676.
- 731 31. Andersen, S.O., *Insect cuticular sclerotization: A review*. Insect Biochemistry and  
732 Molecular Biology, 2010. **40**(3): p. 166-178.
- 733 32. González-Santoyo, I. and A. Córdoba-Aguilar, *Phenoloxidase: a key component of the*  
734 *insect immune system*. Entomologia Experimentalis et Applicata, 2012. **142**(1): p. 1-16.
- 735 33. Söderhäll, K. and L. Cerenius, *Role of the prophenoloxidase-activating system in*  
736 *invertebrate immunity*. Current Opinion in Immunology, 1998. **10**(1): p. 23-28.
- 737 34. Wu, K., et al., *Plant phenolics are detoxified by prophenoloxidase in the insect gut*.  
738 Scientific Reports, 2015. **5**(1): p. 16823.
- 739 35. Liu, S., et al., *Does phenoloxidase contributed to the resistance? Selection with butane-*  
740 *fipronil enhanced its activities from diamondback moths*. Open Biochem J, 2009. **3**: p. 9-  
741 13.
- 742 36. Luna-Acosta, A., et al., *Enhanced immunological and detoxification responses in Pacific*  
743 *oysters, Crassostrea gigas, exposed to chemically dispersed oil*. Water Research, 2011.  
744 **45**(14): p. 4103-4118.
- 745 37. Yu, J.-J., et al., *Effects of piperonyl butoxide synergism and cuticular thickening on the*  
746 *contact irritancy response of field Aedes aegypti (Diptera: Culicidae) to deltamethrin*.  
747 Pest Management Science, 2021. **77**(12): p. 5557-5565.
- 748 38. Samal, R.R. and S. Kumar, *Cuticular thickening associated with insecticide resistance in*  
749 *dengue vector, Aedes aegypti L*. International Journal of Tropical Insect Science, 2021.  
750 **41**(1): p. 809-820.

- 751 39. Noppun, V., T. Saito, and T. Miyata, *Cuticular penetration of S-fenvalerate in fenvalerate-*  
752 *resistant and susceptible strains of the diamondback moth, Plutella xylostella (L.)*.  
753 *Pesticide Biochemistry and Physiology*, 1989. **33**(1): p. 83-87.
- 754 40. Balabanidou, V., et al., *Mosquitoes cloak their legs to resist insecticides*. Proceedings of  
755 the Royal Society B: Biological Sciences, 2019. **286**(1907): p. 20191091.
- 756 41. Wood, O., et al., *Cuticle thickening associated with pyrethroid resistance in the major*  
757 *malaria vector Anopheles funestus*. *Parasit Vectors*, 2010. **3**: p. 67.
- 758 42. Yahouédo, G.A., et al., *Contributions of cuticle permeability and enzyme detoxification to*  
759 *pyrethroid resistance in the major malaria vector Anopheles gambiae*. *Scientific Reports*,  
760 2017. **7**(1): p. 11091.
- 761 43. Bass, C. and C.M. Jones, *Mosquitoes boost body armor to resist insecticide attack*.  
762 *Proceedings of the National Academy of Sciences*, 2016. **113**(33): p. 9145-9147.
- 763 44. Balabanidou, V., et al., *Cytochrome P450 associated with insecticide resistance catalyzes*  
764 *cuticular hydrocarbon production in Anopheles gambiae*. *Proc Natl Acad Sci U S A*, 2016.  
765 **113**(33): p. 9268-73.
- 766 45. Li, D.-T., et al., *Ten fatty acyl-CoA reductase family genes were essential for the survival*  
767 *of the destructive rice pest, Nilaparvata lugens*. *Pest Management Science*, 2020. **76**(7):  
768 p. 2304-2315.
- 769 46. Adams, K.L., et al., *Cuticular hydrocarbons are associated with mating success and*  
770 *insecticide resistance in malaria vectors*. *Communications Biology*, 2021. **4**(1): p. 911.
- 771 47. Qiu, Y., et al., *An insect-specific P450 oxidative decarboxylase for cuticular hydrocarbon*  
772 *biosynthesis*. *Proc Natl Acad Sci U S A*, 2012. **109**(37): p. 14858-63.
- 773 48. Hardstone, M.C., C.A. Leichter, and J.G. Scott, *Multiplicative interaction between the two*  
774 *major mechanisms of permethrin resistance, kdr and cytochrome P450-monoxygenase*  
775 *detoxification, in mosquitoes*. *J Evol Biol*, 2009. **22**(2): p. 416-23.
- 776 49. Smith, L.B., et al., *Fitness costs of individual and combined pyrethroid resistance*  
777 *mechanisms, kdr and CYP-mediated detoxification, in Aedes aegypti*. *PLOS Neglected*  
778 *Tropical Diseases*, 2021. **15**(3): p. e0009271.
- 779 50. Smith, L.B., et al., *CYP-mediated permethrin resistance in Aedes aegypti and evidence for*  
780 *trans-regulation*. *PLOS Neglected Tropical Diseases*, 2018. **12**(11): p. e0006933.
- 781 51. Wang, Y., P. Aisen, and A. Casadevall, *Melanin, melanin "ghosts," and melanin*  
782 *composition in Cryptococcus neoformans*. *Infect Immun*, 1996. **64**(7): p. 2420-4.
- 783 52. Vézilier, J., et al., *The impact of insecticide resistance on Culex pipiens immunity*.  
784 *Evolutionary Applications*, 2013. **6**(3): p. 497-509.
- 785 53. Cornet, S., S. Gandon, and A. Rivero, *Patterns of phenoloxidase activity in insecticide*  
786 *resistant and susceptible mosquitoes differ between laboratory-selected and wild-caught*  
787 *individuals*. *Parasites & Vectors*, 2013. **6**(1): p. 315.
- 788 54. Cerenius, L., B.L. Lee, and K. Söderhäll, *The proPO-system: pros and cons for its role in*  
789 *invertebrate immunity*. *Trends in Immunology*, 2008. **29**(6): p. 263-271.
- 790 55. Chrissian, C., et al., *Solid-state NMR spectroscopy identifies three classes of lipids in*  
791 *Cryptococcus neoformans melanized cell walls and whole fungal cells*. *J Biol Chem*, 2020.  
792 **295**(44): p. 15083-15096.

- 793 56. Latocha, M., et al., *Pyrolytic GC-MS analysis of melanin from black, gray and yellow*  
794 *strains of Drosophila melanogaster*. Journal of Analytical and Applied Pyrolysis, 2000.  
795 **56**(1): p. 89-98.
- 796 57. Christensen, A.M., et al., *Detection of cross-links in insect cuticle by REDOR NMR*  
797 *spectroscopy*. Journal of the American Chemical Society, 1991. **113**(18): p. 6799-6802.
- 798 58. Chrissian, C., et al., *Unconventional Constituents and Shared Molecular Architecture of*  
799 *the Melanized Cell Wall of C. neoformans and Spore Wall of S. cerevisiae*. J Fungi (Basel),  
800 2020. **6**(4).
- 801 59. Chatterjee, S., et al., *Using solid-state NMR to monitor the molecular consequences of*  
802 *Cryptococcus neoformans melanization with different catecholamine precursors*.  
803 Biochemistry, 2012. **51**(31): p. 6080-8.
- 804 60. Chrissian, C., et al., *Melanin deposition in two Cryptococcus species depends on cell-wall*  
805 *composition and flexibility*. J Biol Chem, 2020. **295**(7): p. 1815-1828.
- 806 61. Kramer, K.J., T.L. Hopkins, and J. Schaefer, *Applications of solids NMR to the analysis of*  
807 *insect sclerotized structures*. Insect Biochemistry and Molecular Biology, 1995. **25**(10): p.  
808 1067-1080.
- 809 62. Chang, J., et al., *Solid-state NMR reveals differential carbohydrate utilization in*  
810 *diapausing Culex pipiens*. Scientific Reports, 2016. **6**(1): p. 37350.
- 811 63. Sugumaran, M. and H. Barek, *Critical Analysis of the Melanogenic Pathway in Insects*  
812 *and Higher Animals*. International Journal of Molecular Sciences, 2016. **17**(10): p. 1753-  
813 n/a.
- 814 64. Chatterjee, S., et al., *Solid-state NMR Reveals the Carbon-based Molecular Architecture*  
815 *of Cryptococcus neoformans Fungal Eumelanins in the Cell Wall*. J Biol Chem, 2015.  
816 **290**(22): p. 13779-90.
- 817 65. Camacho, E., et al., *The structural unit of melanin in the cell wall of the fungal pathogen*  
818 *Cryptococcus neoformans*. J Biol Chem, 2019. **294**(27): p. 10471-10489.
- 819 66. Baker, R.P., et al., *Cryptococcus neoformans melanization incorporates multiple*  
820 *catecholamines to produce polytypic melanin*. J Biol Chem, 2022. **298**(1): p. 101519.
- 821 67. Zhong, J., et al., *Following fungal melanin biosynthesis with solid-state NMR: biopolymer*  
822 *molecular structures and possible connections to cell-wall polysaccharides*. Biochemistry,  
823 2008. **47**(16): p. 4701-10.
- 824 68. Jones, C.M., et al., *The dynamics of pyrethroid resistance in Anopheles arabiensis from*  
825 *Zanzibar and an assessment of the underlying genetic basis*. Parasites & Vectors, 2013.  
826 **6**(1): p. 343.
- 827 69. Sun, H., et al., *Transcriptomic and proteomic analysis of pyrethroid resistance in the CKR*  
828 *strain of Aedes aegypti*. PLOS Neglected Tropical Diseases, 2021. **15**(11): p. e0009871.
- 829 70. Savarit, F., et al., *Genetic elimination of known pheromones reveals the fundamental*  
830 *chemical bases of mating and isolation in Drosophila*. Proc Natl Acad Sci U S A, 1999.  
831 **96**(16): p. 9015-20.
- 832 71. Polerstock, A.R., S.D. Eigenbrode, and M.J. Klowden, *Mating Alters the Cuticular*  
833 *Hydrocarbons of Female Anopheles gambiae sensu stricto and Aedes aegypti (Diptera:*  
834 *Culicidae)*. Journal of Medical Entomology, 2002. **39**(3): p. 545-552.
- 835 72. Aldersley, A. and L.J. Cator, *Female resistance and harmonic convergence influence male*  
836 *mating success in Aedes aegypti*. Scientific Reports, 2019. **9**(1): p. 2145.

- 837 73. Alonso, D.P., et al., *Gene expression profile of Aedes aegypti females in courtship and*  
838 *mating*. Scientific Reports, 2019. **9**(1): p. 15492.
- 839 74. Shono, T., T. Unai, and J.E. Casida, *Metabolism of permethrin isomers in American*  
840 *cockroach adults, house fly adults, and cabbage looper larvae*. Pesticide Biochemistry  
841 and Physiology, 1978. **9**(1): p. 96-106.
- 842 75. Stevenson, B.J., et al., *Pinpointing P450s associated with pyrethroid metabolism in the*  
843 *dengue vector, Aedes aegypti: developing new tools to combat insecticide resistance*.  
844 PLoS Negl Trop Dis, 2012. **6**(3): p. e1595.
- 845 76. Alexandri, E., et al., *High Resolution NMR Spectroscopy as a Structural and Analytical*  
846 *Tool for Unsaturated Lipids in Solution*. Molecules, 2017. **22**(10).
- 847 77. Hakumäki, J.M. and R.A. Kauppinen, *1H NMR visible lipids in the life and death of cells*.  
848 Trends Biochem Sci, 2000. **25**(8): p. 357-62.
- 849 78. Rémy, C., et al., *Evidence that mobile lipids detected in rat brain glioma by 1H nuclear*  
850 *magnetic resonance correspond to lipid droplets*. Cancer Res, 1997. **57**(3): p. 407-14.
- 851 79. Rakhmatullin, I.Z., et al., *NMR chemical shifts of carbon atoms and characteristic shift*  
852 *ranges in the oil sample*. Petroleum Research, 2022. **7**(2): p. 269-274.
- 853 80. Stadler Martin, J., *Lipid composition of fat body and its contribution to the maturing*  
854 *oöcytes in Pyrrhocoris apterus*. Journal of Insect Physiology, 1969. **15**(6): p. 1025-1045.
- 855 81. Arrese, E.L., et al., *Lipid storage and mobilization in insects: current status and future*  
856 *directions*. Insect Biochem Mol Biol, 2001. **31**(1): p. 7-17.
- 857 82. Rivero, A., et al., *Energetic cost of insecticide resistance in Culex pipiens mosquitoes*. J  
858 Med Entomol, 2011. **48**(3): p. 694-700.
- 859 83. Hardstone, M.C., et al., *Differences in development, glycogen, and lipid content*  
860 *associated with cytochrome P450-mediated permethrin resistance in Culex pipiens*  
861 *quinquefasciatus (Diptera: Culicidae)*. J Med Entomol, 2010. **47**(2): p. 188-98.
- 862 84. Smith, L.B., S. Kasai, and J.G. Scott, *Pyrethroid resistance in Aedes aegypti and Aedes*  
863 *albopictus: Important mosquito vectors of human diseases*. Pesticide Biochemistry and  
864 Physiology, 2016. **133**: p. 1-12.
- 865 85. Kuno, G., *Early history of laboratory breeding of Aedes aegypti (Diptera: Culicidae)*  
866 *focusing on the origins and use of selected strains*. J Med Entomol, 2010. **47**(6): p. 957-  
867 71.
- 868 86. Lesperance, D.N.A. and N.A. Broderick, *Meta-analysis of Diets Used in Drosophila*  
869 *Microbiome Research and Introduction of the Drosophila Dietary Composition Calculator*  
870 *(DDCC)*. G3 Genes|Genomes|Genetics, 2020. **10**(7): p. 2207-2211.
- 871
- 872
